# Supplementary material
Source: PubMed Central journal article supplement (PMC2270936)
Supplement: rspb20070495s13.pdf [file rspb20070495s13.pdf]

## Table 1

Summary table showing the prevalence of frequency-dependence between mutualist genotypes, using fitness data from an experiment pairing four genotypes of *Medicago truncatula* with two strains of *Sinorhizobium medicae* in ambient or elevated nitrogen (N) environments. The outcomes of 96 pairwise comparisons are shown, each between two plant populations and two rhizobium strains. Plant fitness was estimated as leaf number and fruit number; rhizobium fitness was estimated as nodule number (NN), mean nodule length (NL), mean nodule branches (NB), and total nodule volume (nodule number\*length, TNV). A summary of outcomes is presented for each set of comparisons.

Consistent with the methods outlined in Bever (1999), four outcomes are possible for each comparison. Outcomes I, II, and III are expected ultimately to lead to fixation in both interacting partners. Outcome IV is consistent with selection that is expected to maintain genetic diversity in mutualist populations.

- I:** selection favors a single genotype in both partners
- II:** selection on one partner is frequency dependent, but not both
- III:** positive frequency-dependence in both partners
- IV:** negative frequency-dependence in both partners

| <b>Plant Populations Compared</b> | <b>N-Treatment</b> | <b>Plant Fitness Estimate</b> | <b>NN</b> | <b>NL</b> | <b>NB</b> | <b>TNV</b> |
|-----------------------------------|--------------------|-------------------------------|-----------|-----------|-----------|------------|
| 4 vs. 6                           | C                  | Leaf Num.                     | I         | I         | I         | I          |
| 4 vs. 6                           | N                  | Leaf Num.                     | I         | I         | I         | I          |
| 4 vs. 9                           | C                  | Leaf Num.                     | I         | I         | I         | II         |
| 4 vs. 9                           | N                  | Leaf Num.                     | III       | II        | II        | III        |
| 4 vs. 10                          | C                  | Leaf Num.                     | II        | I         | II        | II         |
| 4 vs. 10                          | N                  | Leaf Num.                     | I         | I         | I         | I          |
| 6 vs. 9                           | C                  | Leaf Num.                     | II        | II        | II        | III        |
| 6 vs. 9                           | N                  | Leaf Num.                     | II        | I         | I         | II         |
| 6 vs. 10                          | C                  | Leaf Num.                     | III       | II        | II        | III        |
| 6 vs. 10                          | N                  | Leaf Num.                     | I         | I         | I         | I          |
| 9 vs. 10                          | C                  | Leaf Num.                     | II        | I         | II        | I          |
| 9 vs. 10                          | N                  | Leaf Num.                     | III       | II        | II        | III        |
| 4 vs. 6                           | C                  | Fruit Num.                    | II        | II        | II        | II         |
| 4 vs. 6                           | N                  | Fruit Num.                    | II        | II        | II        | II         |
| 4 vs. 9                           | C                  | Fruit Num.                    | I         | I         | I         | II         |
| 4 vs. 9                           | N                  | Fruit Num.                    | III       | II        | II        | III        |
| 4 vs. 10                          | C                  | Fruit Num.                    | II        | I         | II        | II         |
| 4 vs. 10                          | N                  | Fruit Num.                    | I         | I         | I         | I          |
| 6 vs. 9                           | C                  | Fruit Num.                    | I         | I         | I         | II         |
| 6 vs. 9                           | N                  | Fruit Num.                    | III       | II        | II        | II         |
| 6 vs. 10                          | C                  | Fruit Num.                    | II        | I         | II        | II         |
| 6 vs. 10                          | N                  | Fruit Num.                    | I         | I         | I         | I          |
| 9 vs. 10                          | C                  | Fruit Num.                    | II        | I         | II        | I          |
| 9 vs. 10                          | N                  | Fruit Num.                    | II        | I         | I         | II         |

**TOTAL (96 comparisons):**

|     |           |
|-----|-----------|
| I   | <b>44</b> |
| II  | <b>42</b> |
| III | <b>10</b> |
| IV  | <b>0</b>  |
