# Supplementary material
Source: PubMed Central journal article supplement (PMC2270936)

Fig. 1 Map of ten *Medicago truncatula* populations used in the plant x rhizobium experiment. Filled circles represent populations used in the N-addition experiment. Seeds were obtained from the USDA/ARS National Plant Germplasm System.

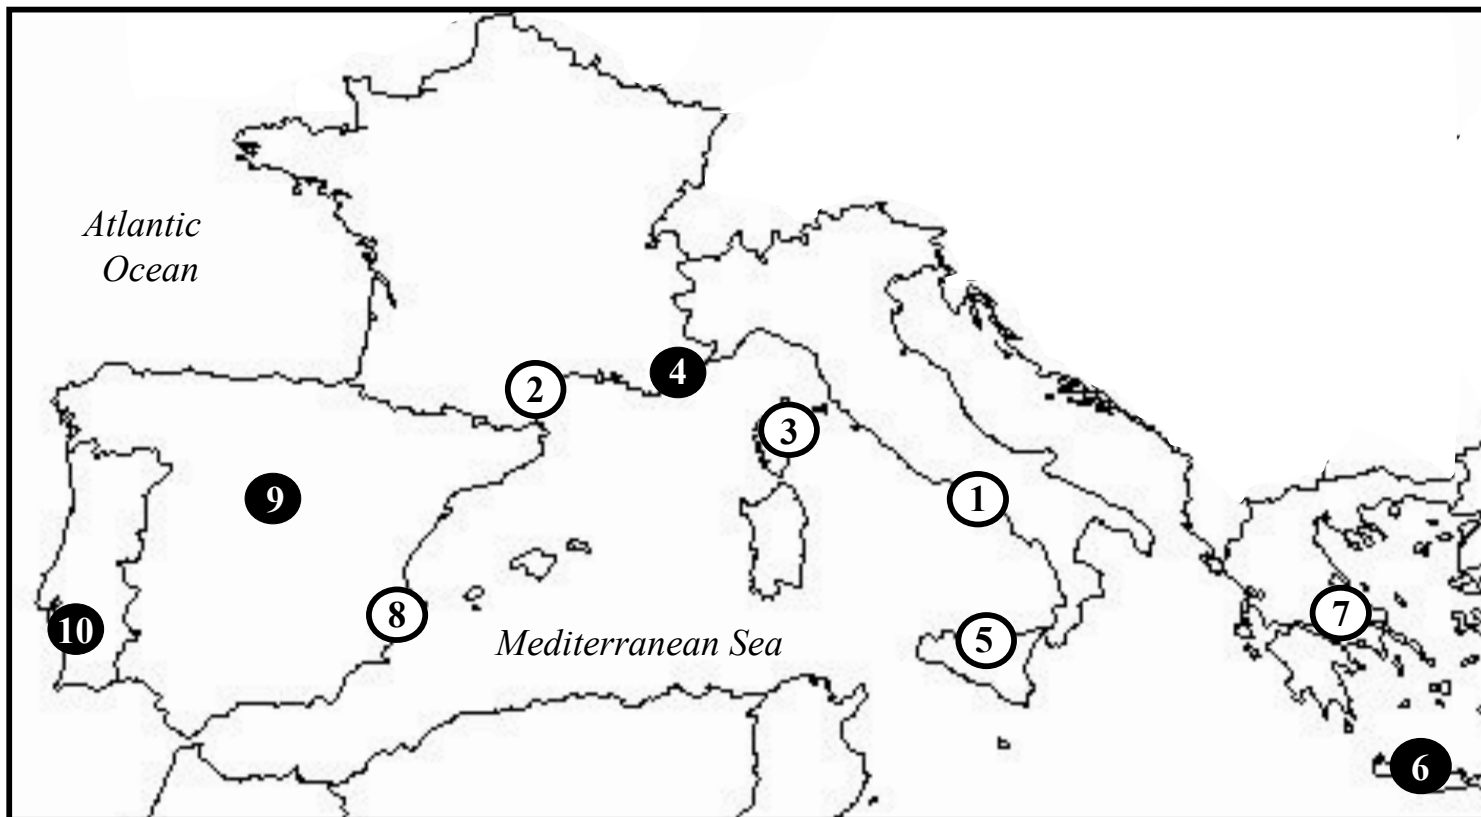

Supplement: rspb20070495s14.pdf [file rspb20070495s14.pdf]
