# Supplementary material
Source: PubMed Central journal article supplement (PMC2270936)
Supplement: rspb20070495s15.pdf [file rspb20070495s15.pdf]

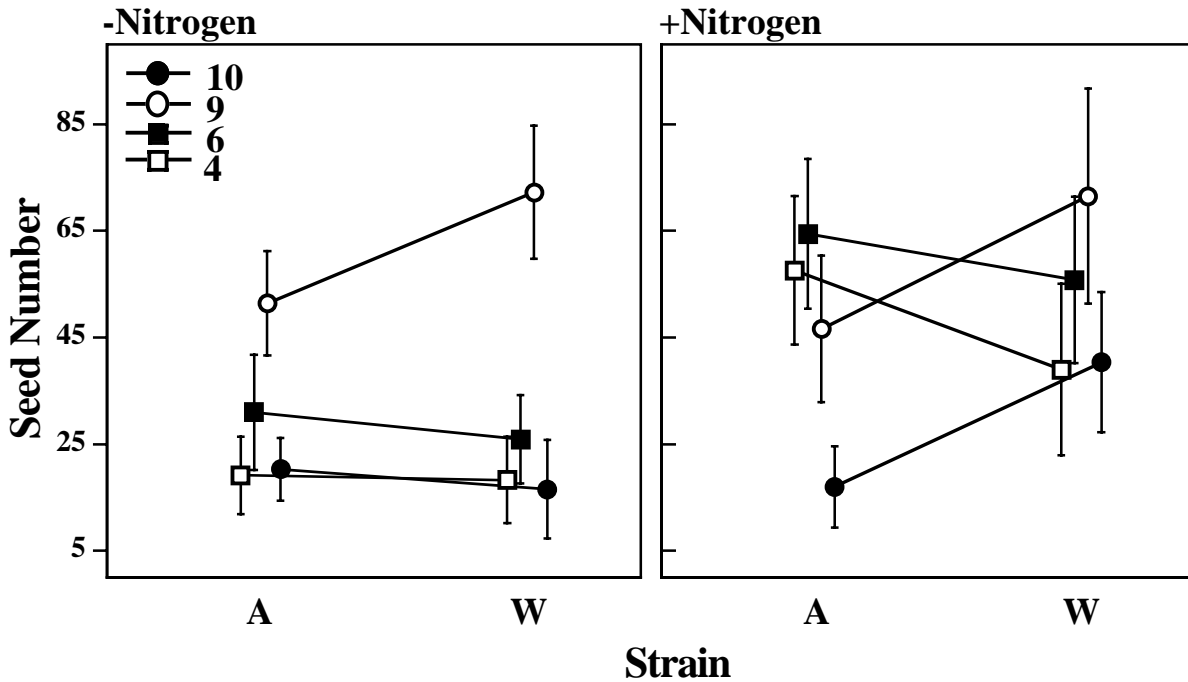

Figure 3a Mean seed number of plants from four *M. truncatula* populations in symbiosis with two genotypes of *S. medicae* either without (left column) or with (right column) added nitrogen.

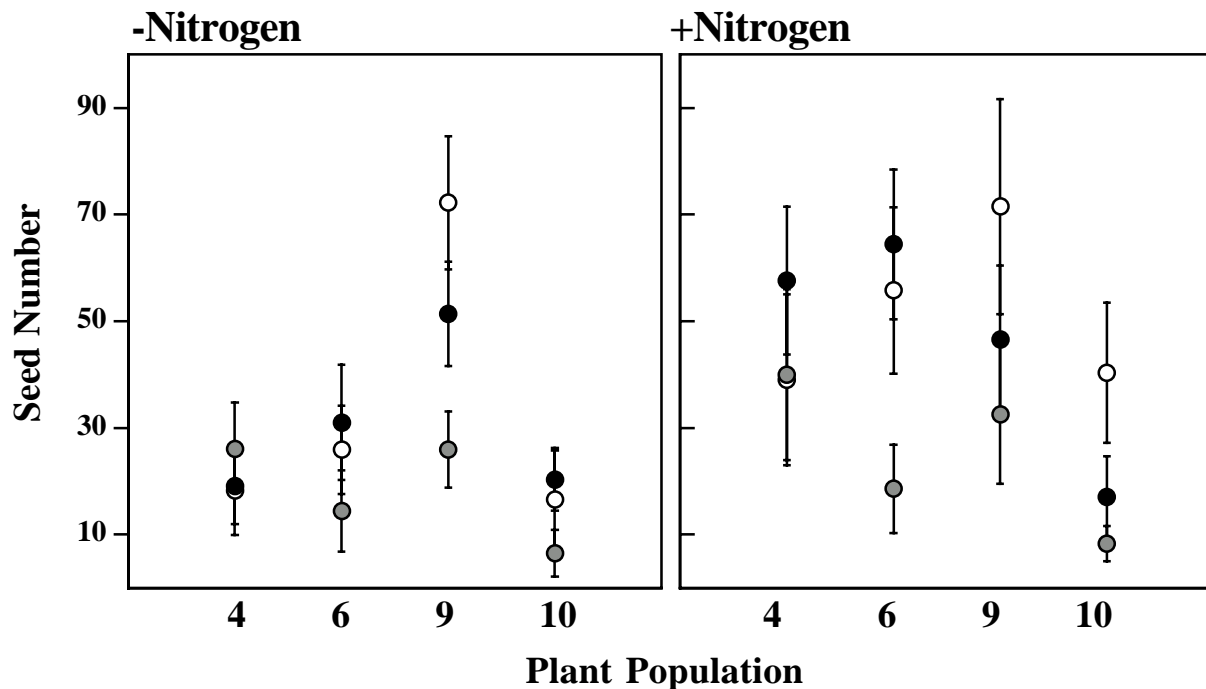

Figure 3b Mean seed number produced by each of four *M. truncatula* populations in three *S. medicae* inoculation treatments (genotype A alone, genotype W alone, or a 1:1 mixture of A&W), either without (left column) or with (right column) added nitrogen.
