# Supplementary material
Source: PubMed Central journal article supplement (PMC2270936)
Supplement: rspb20070495s16.pdf [file rspb20070495s16.pdf]

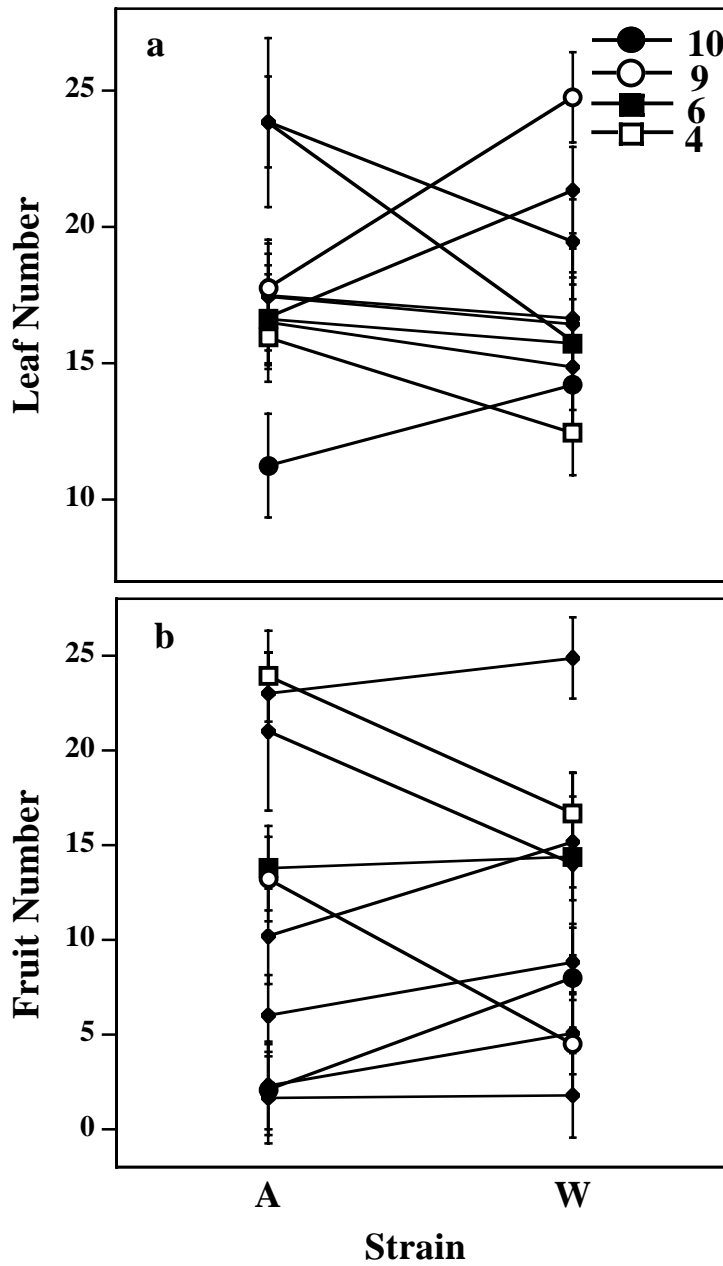

Figure 2 Mean growth and fitness, measured by (a) leaf number and (b) fruit number, of ten *Medicago truncatula* populations in symbiosis with two single strain inocula (A or W) of *Sinorhizobium medicae*.
